# Supplementary material
Source: PubMed Central journal article supplement (PMC2856250)

## SUPPLEMENTARY INFORMATION

**Supplemental Table S1. Primers used in qPCR.**

**Supplemental Table S2. qPCR: Assymetrical values for the indicated genes using the  $2^{-\Delta\Delta C_t}$  method.**

**Supplemental Figure S1. Luciferase activity in SV40 MEFs stably transfected with the TGF- $\beta$  responsive element.** Stable Transfection of the TGF- $\beta$  responsive element was carried out as described in materials and methods. Luciferase activities were measured in cells seeded monolayer (in the presence or absence of recombinant TGF- $\beta$ 1 or activin A) or in cells extracted from collagen gels as described in materials and methods. Values are calibrated to the luciferase activity produced by exogenous addition of 0.5 ng/ml of recombinant TGF- $\beta$ 1.

**Supplemental Figure S2. Negative control for  $\alpha$ 11 protein expression in SV40 MEFs within attached gels.** Cells in attached collagen gels were collected as described in materials and methods at 24 and 96h. Cell lysates were subjected to western blots using  $\alpha$ 11 polyclonal antibody to  $\alpha$ 11 or the corresponding preimmune serum, both used at the same concentration (1:500) and under the same conditions. The blots for  $\alpha$ 11 was exposed for longer time to better appreciate its up-regulation.

**Supplemental Figure S3. Positive control for TGF- $\beta$  monoclonal antibody.** Cells either remained unstimulated, were treated with 5 ng/ml of recombinant TGF- $\beta$ 1 alone, or were treated with 5 ng/ml of TGF- $\beta$ 1 that had been previously preincubated with 10  $\mu$ g/ml of anti-TGF- $\beta$  in serum-free DMEM at 37°C for 30 min. Serum was removed prior to the addition of TGF- $\beta$ 1 with or without its blocking antibody.

**Supplemental Figure S4. Induction of  $\alpha$ 11 and  $\alpha$ -SMA by activin A in corneal fibroblasts grown on collagen I monolayers (longer exposure).** The upregulation of  $\alpha$ 11 and  $\alpha$ -SMA caused by activin A was less prominent from that produced by TGF- $\beta$  in corneal fibroblasts. In order to clearly appreciate such upregulation, membranes with the corresponding samples had to be exposed for a longer period.

**Supplemental Figure S5. Immunolocalization of  $\alpha$ -SMA in corneal fibroblasts grown on collagen I (lower magnification).** Cells remained untreated (upper left), were stimulated with 5 ng/ml of TGF- $\beta$ 1 only (upper right) or treated with 5 ng/ml of TGF- $\beta$ 1 and siRNA (100 nM) to  $\alpha$ 11 (lower right) or an off-target siRNA (negative control, NC; lower left). The exposure time when taking pictures was identical in all conditions.

## Supplementary Table S1

### Sequences of primers used for qPCR.

| Target gene                        | Forward (5'-3')       | Reverse (5'-3')        | Annealing T (°C) |
|------------------------------------|-----------------------|------------------------|------------------|
| <b>TGF-<math>\beta</math>1</b>     | ACAATTCCTGGCGTTACCTT  | G TTCAGCCACTGCCGTACAAC | 55               |
| <b>Activin <math>\beta</math>A</b> | TGAAGAAGAGACCCGATGTCA | GCTTTCTGATCGCGTTGAG    | 55               |
| <b>ALK4</b>                        | TGCTGCCCGTCTGACA      | TGCCCAGGTTCTTTGTGTAGG  | 54               |
| <b>ALK5</b>                        | AGCATTGGCAAAGGTCGG    | ATCTCTGCCTCTCGGAACCAT  | 54               |
| <b><math>\alpha</math>11</b>       | GACAGCACCGCAGACGAT    | GCTGTTTGCCTTGACCTCGAA  | 58               |
| <b>GAPDH</b>                       | CGAGACCCCACTAACATCAA  | TTCACACCCATCACAAACAT   | 58               |

## Supplementary Table S2

qPCR: Assimetrical error values for the indicated genes

### Negative error bar values

|                      | $\alpha 11$ | TGF- $\beta 1$ | Act $\beta A$ | ALK5     | ALK4     |
|----------------------|-------------|----------------|---------------|----------|----------|
| <b>24 h attached</b> | 0,536616    | 0,522505       | 0,13494       | 0,503166 | 0,387565 |
| <b>48 h attached</b> | 0,44143     | 0,486055       | 0,129567      | 0,341399 | 0,356489 |
| <b>72 h attached</b> | 0,642768    | 0,426852       | 0,114066      | 0,348133 | 0,312786 |
| <b>96 h attached</b> | 0,355672    | 0,431622       | 0,15991       | 0,14596  | 0,271712 |
| <b>Monolayer</b>     | 0,081049    | 0,090772       | 0,302756      | 0,077886 | -0,21198 |
| <b>2h floating</b>   | 0,102495    | 0,158988       | 0,065923      | 0,101382 | 0,093065 |
| <b>8h floating</b>   | 0,053125    | 0,233605       | 0,065096      | 0,220634 | 0,168509 |
| <b>24h floating</b>  | 0,223843    | 0,975517       | 0,111938      | 1,096156 | 0,86358  |
| <b>48h floating</b>  | 0,078019    | 0,220806       | 0,098038      | 0,679024 | 0,122768 |

### Positive error bar values

|                      | $\alpha 11$ | TGF- $\beta 1$ | Act $\beta A$ | ALK5     | ALK4     |
|----------------------|-------------|----------------|---------------|----------|----------|
| <b>24 h attached</b> | 0,639905    | 0,585214       | 0,176895      | 0,579094 | 3,511046 |
| <b>48 h attached</b> | 0,499287    | 0,540049       | 0,16767       | 0,369269 | 3,762373 |
| <b>72 h attached</b> | 0,731121    | 0,473477       | 0,15109       | 0,377193 | 3,663334 |
| <b>96 h attached</b> | 0,397       | 0,493093       | 0,242716      | 0,150585 | 3,432427 |
| <b>Monolayer</b>     | 0,088198    | 0,099834       | 0,434219      | 0,084465 | 0,519373 |
| <b>2h floating</b>   | 0,118022    | 0,178477       | 0,087105      | 0,110271 | 0,944097 |
| <b>8h floating</b>   | 0,058802    | 0,275206       | 0,087377      | 0,249379 | 1,384833 |
| <b>24h floating</b>  | 0,384774    | 1,681832       | 0,20305       | 1,931775 | 4,932162 |
| <b>48h floating</b>  | 0,088202    | 0,243077       | 0,129011      | 0,762664 | 4,923919 |

# Supplementary Figure S1

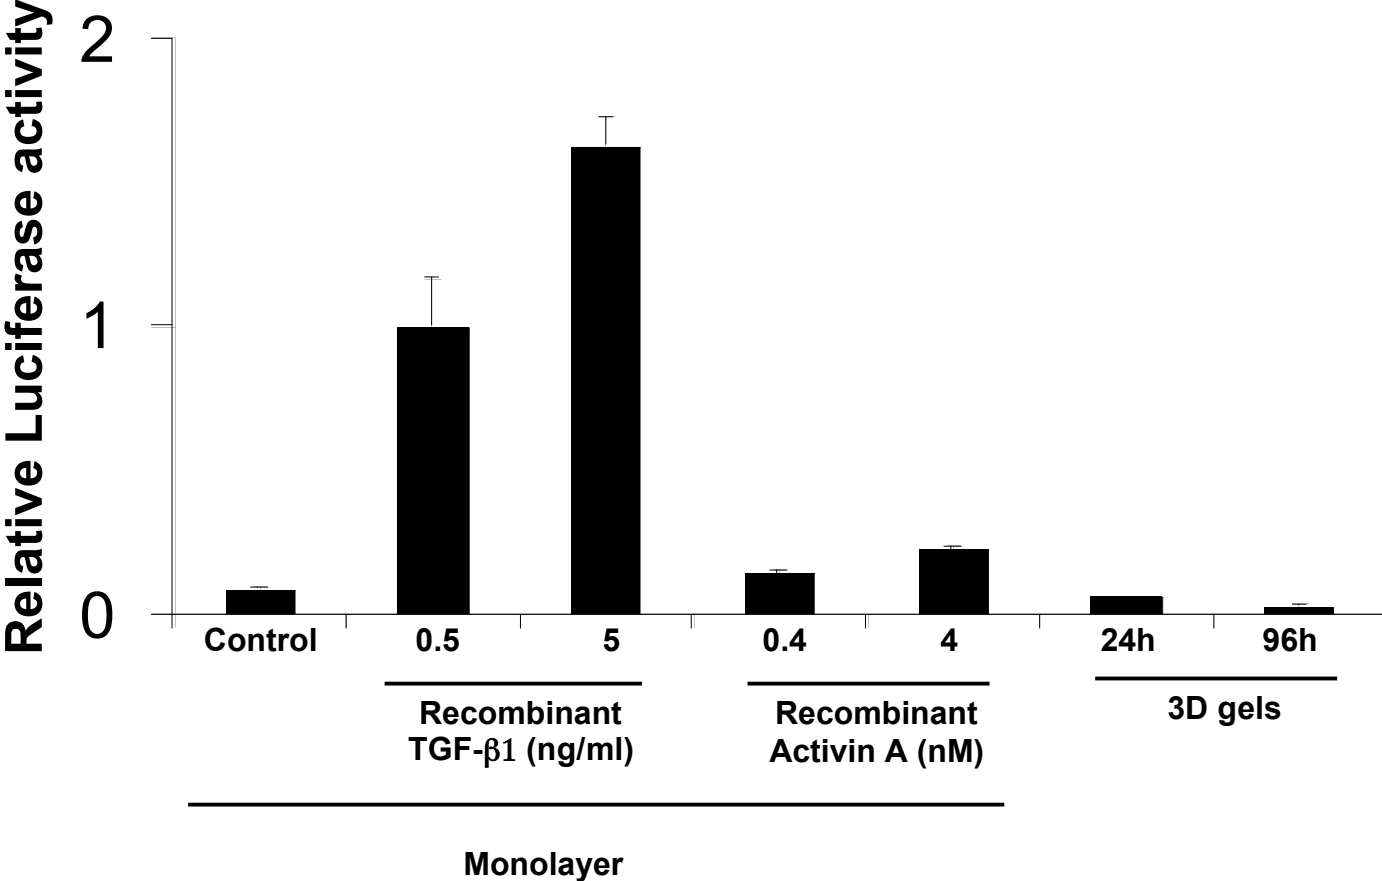

# Supplementary Figure S2

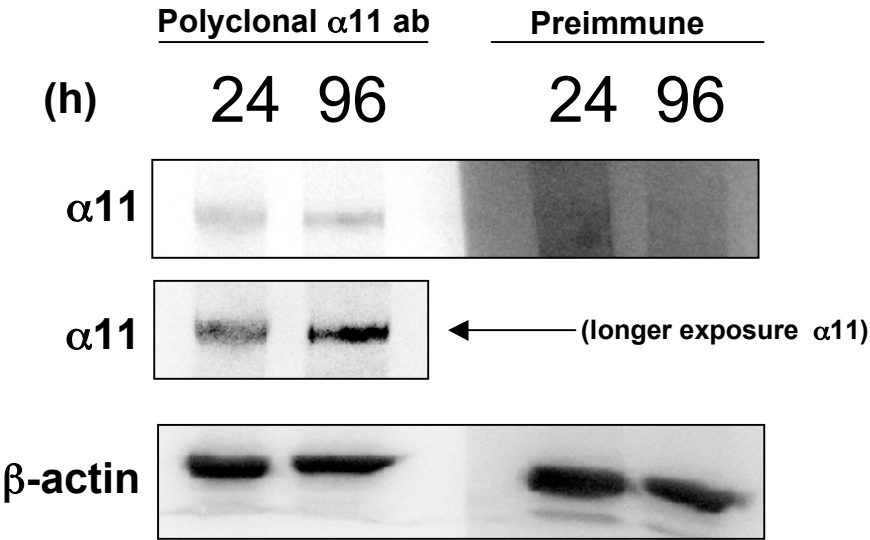

# Supplementary Figure S3

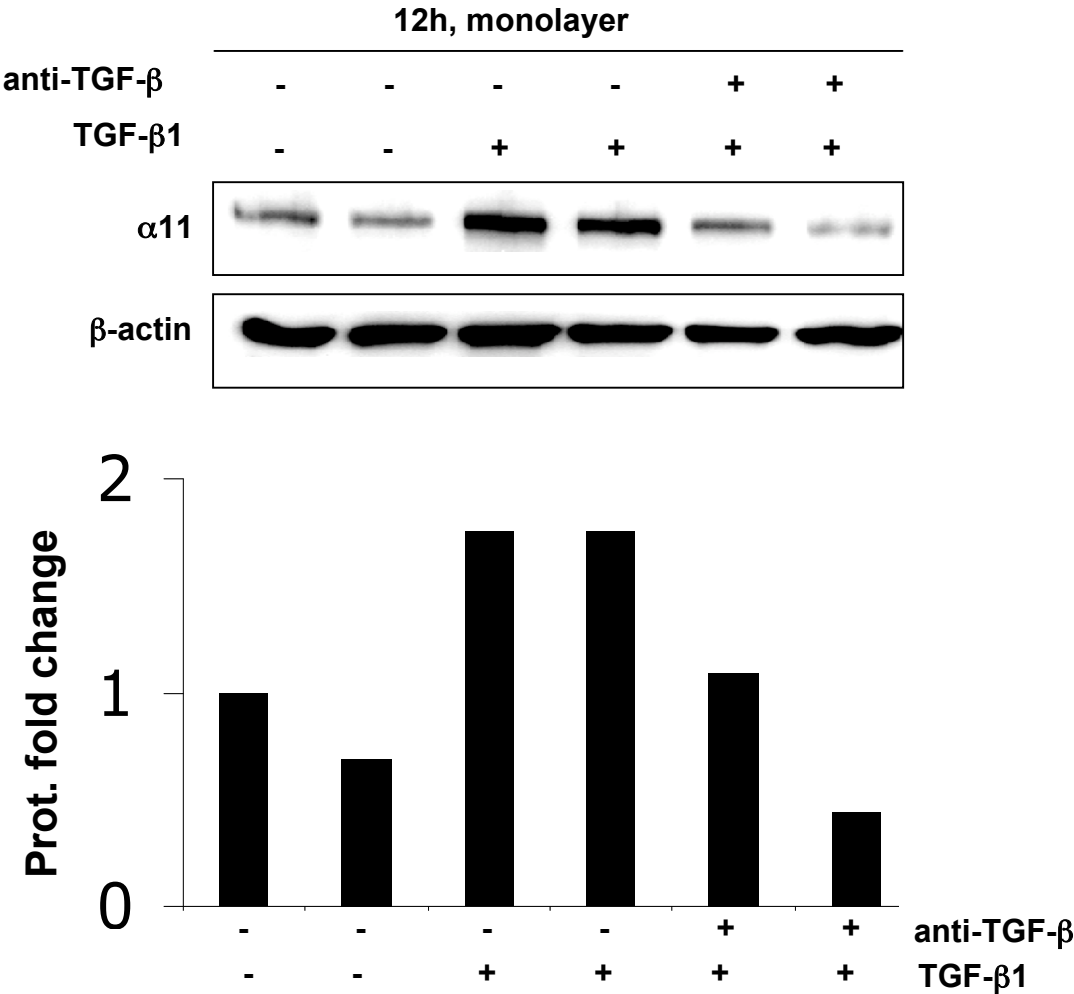

# Supplementary Figure S4

## Longer exposure

72h, monolayer

Act A

- +

$\alpha$ 11

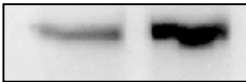

$\alpha$ -SMA

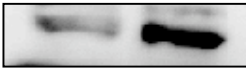

GAPDH

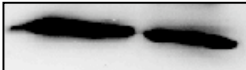

# Supplementary Figure 5

Untreated

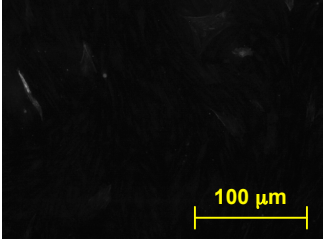

TGF-β1

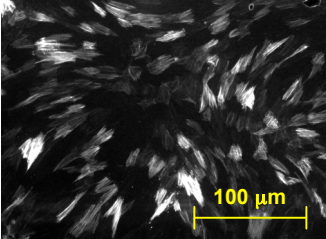

TGF-β1 + NC siRNA

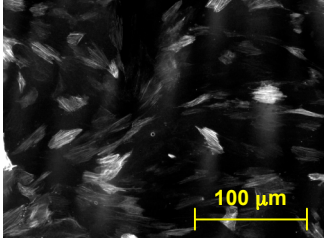

TGF-β1 + α11siRNA

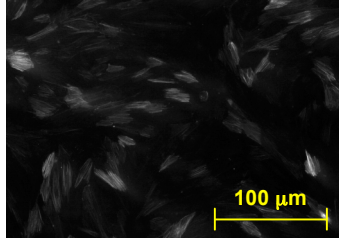

Supplement: supp_M109.078766_supplemental_figures_and_tables.pdf [file supp_M109.078766_supplemental_figures_and_tables.pdf]
